# Supplementary material for: Stress and light sensitive dual-mechanical property of acylhydrazone crystal
Source: Royal Society of Chemistry journal article supplement (doi:10.1039/d3ce00296a), 2023-01-01
Supplement: d3ce00296a1.pdf [file d3ce00296a1.pdf]

## SUPPORTING INFORMATION

### Stress and Light Sensitive Dual Mechanical Property of Acylhydrazone Crystal

*Deepak Manoharan,<sup>a</sup> Shamim Ahmad,<sup>b</sup> Franziska Emmerling,<sup>c</sup> Biswajit Bhattacharya,<sup>\*c</sup>  
Soumyajit Ghosh<sup>\*a</sup>*

<sup>a</sup>Department of Chemistry, SRM Institute of Science and Technology, Kattankulathur 603 203,  
Tamil Nadu, India,

<sup>b</sup>Department of Chemical Sciences, Indian Institute of Science Education and Research  
(IISER) Kolkata, Mohanpur, Nadia, West Bengal, 741246 India.

<sup>c</sup>BAM Federal Institute for Materials Research and Testing, Richard-Willstätter-Str. 11, 12489  
Berlin, Germany.

\* Email: [soumyajitghosh89@gmail.com](mailto:soumyajitghosh89@gmail.com)

[biswajit.bhattacharya@bam.de](mailto:biswajit.bhattacharya@bam.de)

---

| <b>Table of Contents</b>                             | <b>Page No</b> |
|------------------------------------------------------|----------------|
| Synthesis scheme                                     | S3             |
| Three point bending                                  | S3             |
| Elastic Strain calculation                           | S3             |
| Crystallographic Information table                   | S4             |
| Face indexing image                                  | S5             |
| <b>Light induced bending images of BrAc Crystals</b> | S5             |
| NMR Spectroscopy                                     | S6             |
| PXRD analysis                                        | S6             |
| DSC analysis                                         | S7             |
| Energy framework calculation                         | S8             |
| References                                           | S8             |

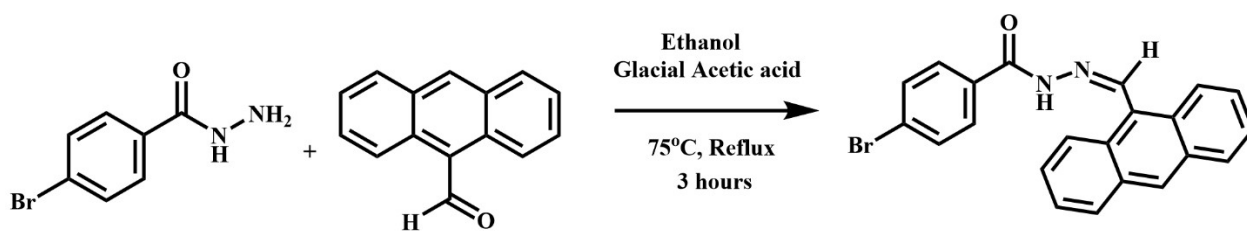

**Fig. S1.** Synthesis scheme of **BrAc** Crystal.

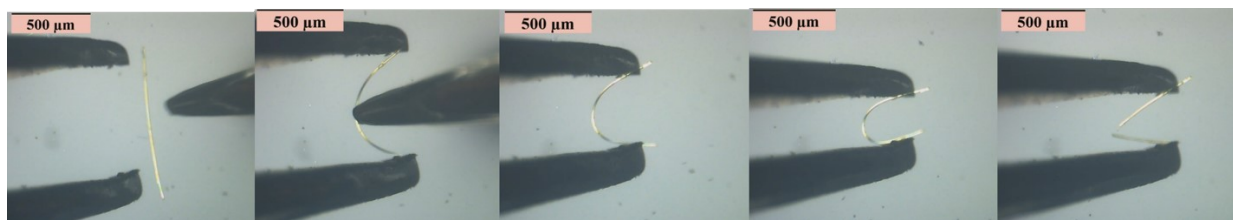

**Fig. S2.** Stepwise three point bending images of **BrAc** Crystal.

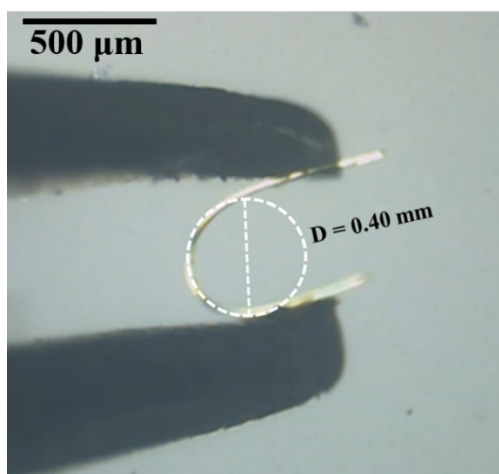

**Fig. S3.** Elastic strain representation of **BrAc** Crystal.

$$R = \frac{D}{2} = \mathbf{0.175mm}, \text{ (where } D \text{ is the diameter of the semi-circle formed and so radius is } \frac{D}{2}\text{)}$$

For a beam with thickness  $t$ ,

$$\varepsilon(\%) = \frac{t}{2R} = \frac{0.014}{0.40} \times 100 = \mathbf{3.5\%}$$

Where ‘ $\varepsilon$  (%)’ is the elastic strain of the crystal, ‘ $t$ ’ is the thickness of the crystal and ‘ $R$ ’ is the radius of the semi-circle formed by bending the crystal.

**Table S1:** Crystallographic information table.

| <b>Compound</b>                  | <b>Crystal BrAc</b>                                              |
|----------------------------------|------------------------------------------------------------------|
| Formula                          | C <sub>22</sub> H <sub>15</sub> Br N <sub>2</sub> O <sub>2</sub> |
| Molecular weight                 | 403.27                                                           |
| T/K                              | 150                                                              |
| Crystal system                   | Monoclinic                                                       |
| Space group                      | <i>P2<sub>1</sub>/c</i>                                          |
| <i>a</i> /Å                      | 4.3315 (4)                                                       |
| <i>b</i> /Å                      | 18.5293(17)                                                      |
| <i>c</i> /Å                      | 21.324(2)                                                        |
| $\alpha$ /°                      | 90                                                               |
| $\beta$ /°                       | 93.751(4)                                                        |
| $\gamma$ /°                      | 90                                                               |
| Volume/Å <sup>3</sup>            | 1707.8(3)                                                        |
| <i>Z</i>                         | 4                                                                |
| $\rho$ , Mg.cm <sup>-3</sup>     | 1.568                                                            |
| $\mu$ /mm <sup>-1</sup>          | 2.420                                                            |
| Reflections collected            | 64457                                                            |
| Independent Reflections          | 3620                                                             |
| R <sub>int</sub>                 | 0.0793                                                           |
| GOF                              | 1.038                                                            |
| Final R[ <i>I</i> >2 $\sigma$ ]  | 0.0425                                                           |
| R <sub>1</sub> / wR <sub>2</sub> | 0.1149                                                           |
| CCDC Number.                     | 2245738                                                          |

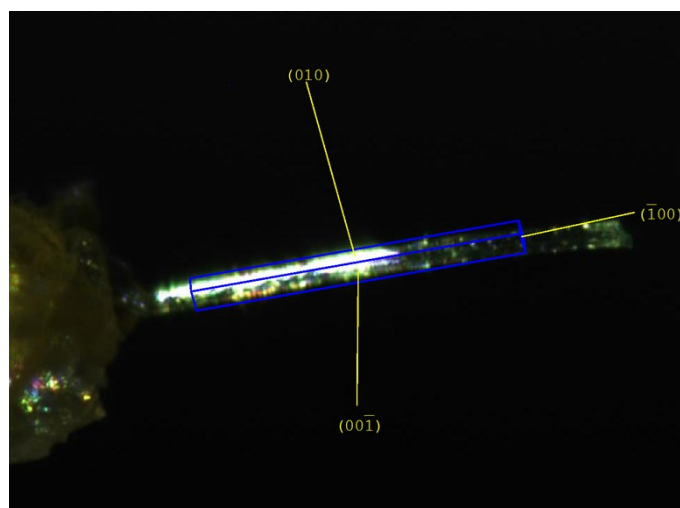

**Fig. S4.** Face indexing image of **BrAc** Crystal.

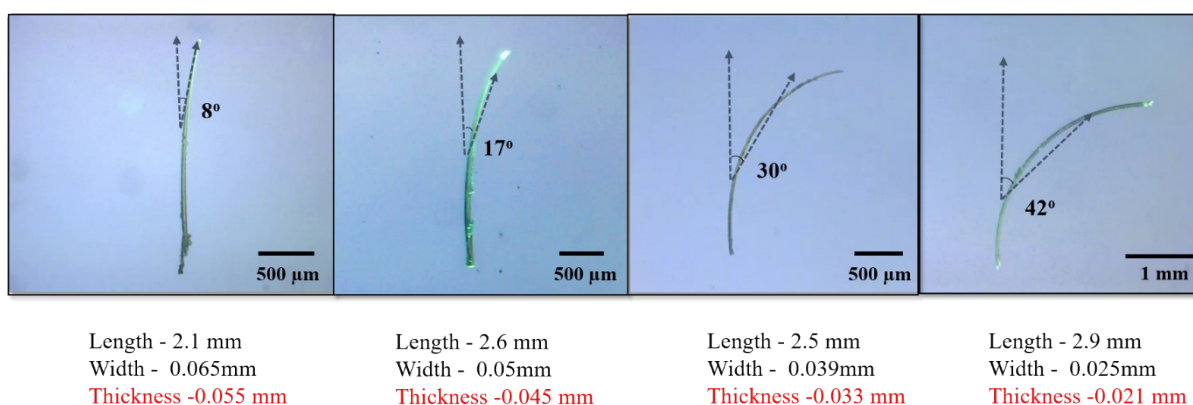

**Fig. S5.** Light induced bending of **BrAc** crystals arranged in order of increasing thickness.

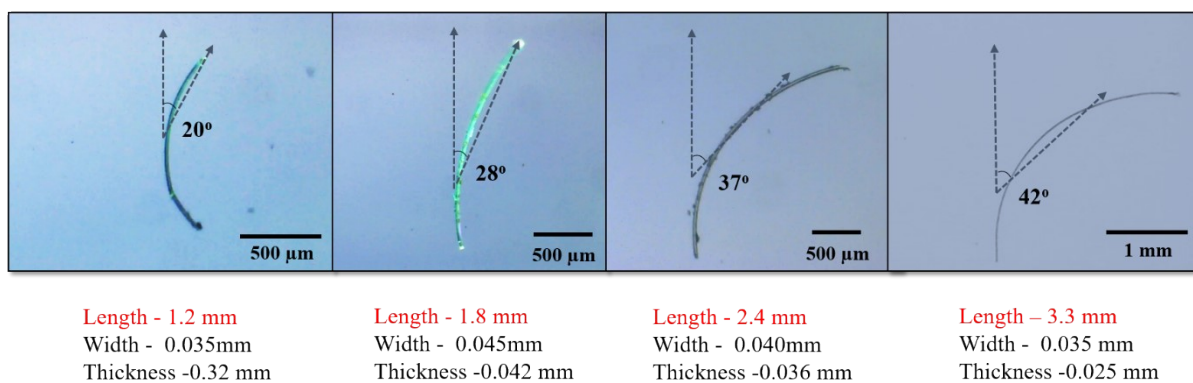

**Fig. S6.** Light induced bending of **BrAc** crystals arranged in order of increasing length.

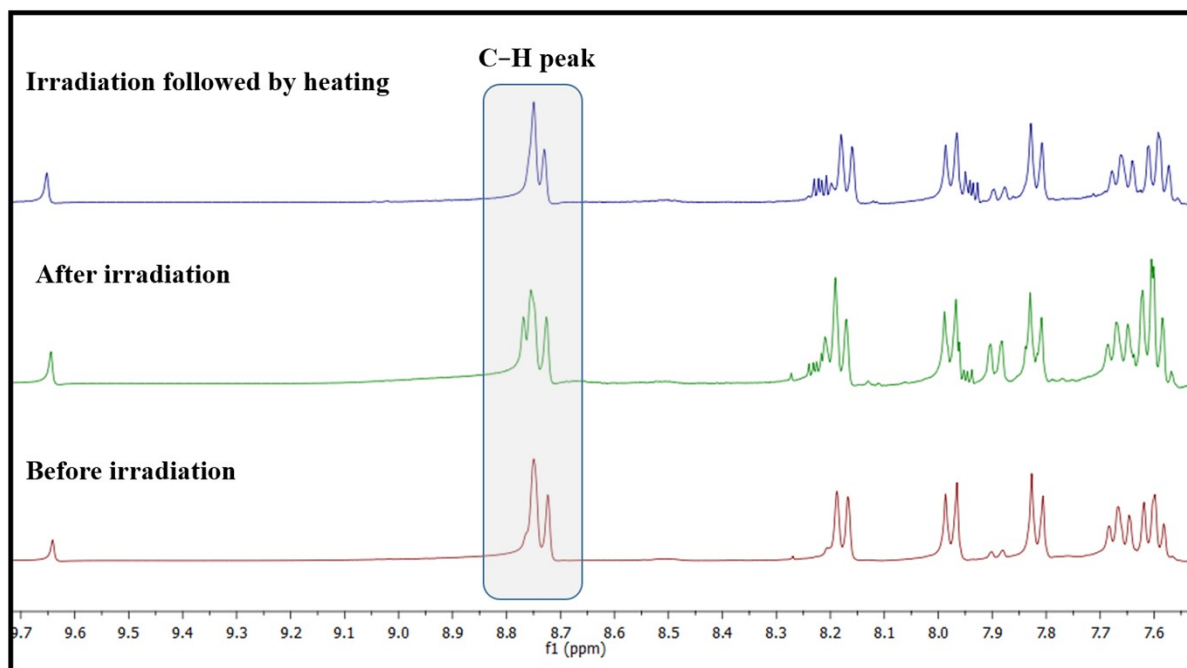

**Fig. S7.** <sup>1</sup>H NMR comparison for Z and E isomers of **BrAc** Crystal.

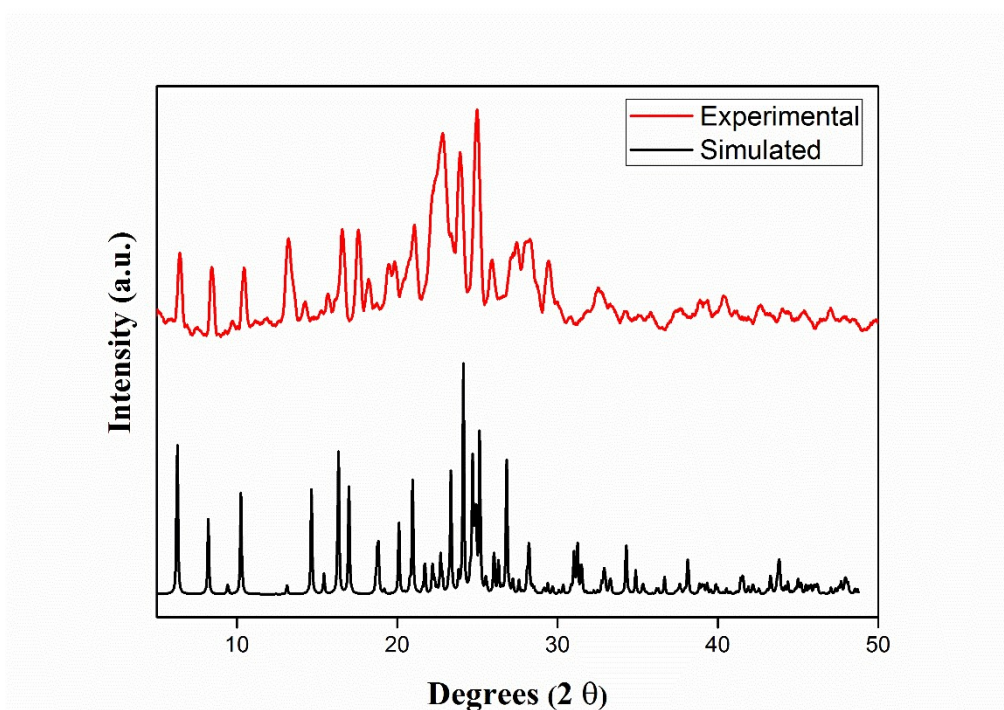

**Fig. S8.** PXRD comparison of simulated pattern and experimental pattern for **BrAc** Crystal.

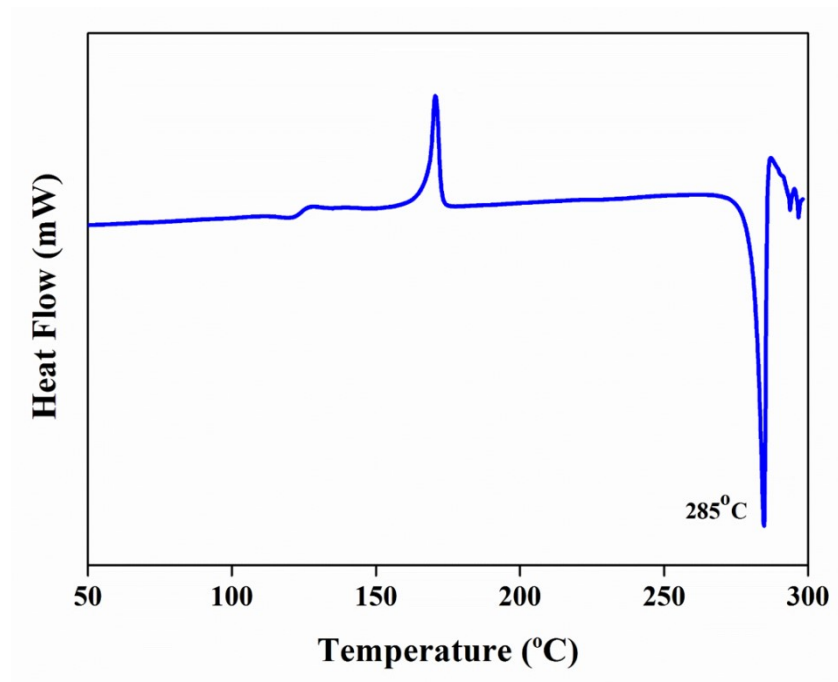

Fig. S9. DSC heating graph of **BrAc** crystal beyond melting point.

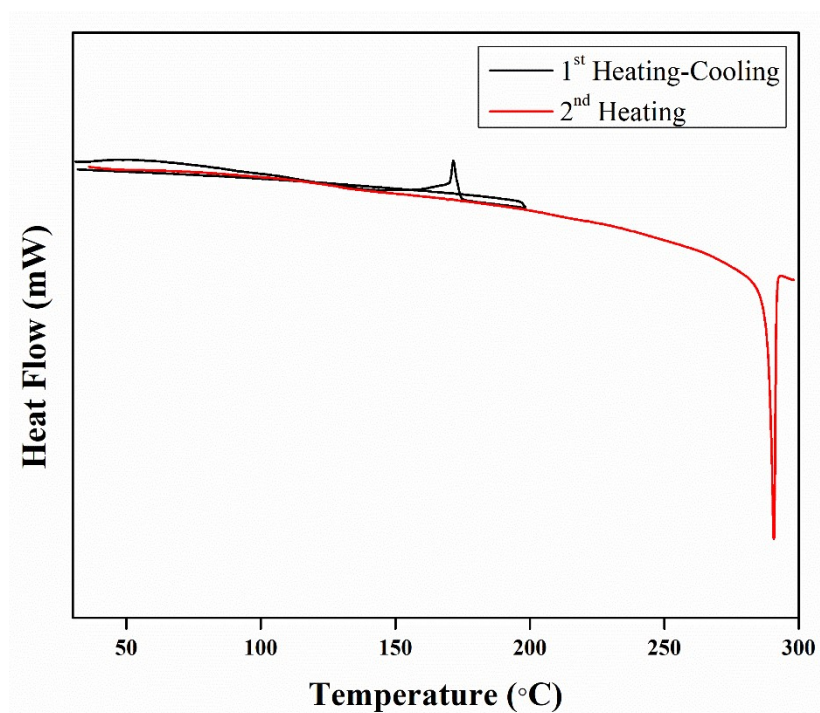

Fig. S10. DSC heating-cooling graph of **BrAc** crystal.



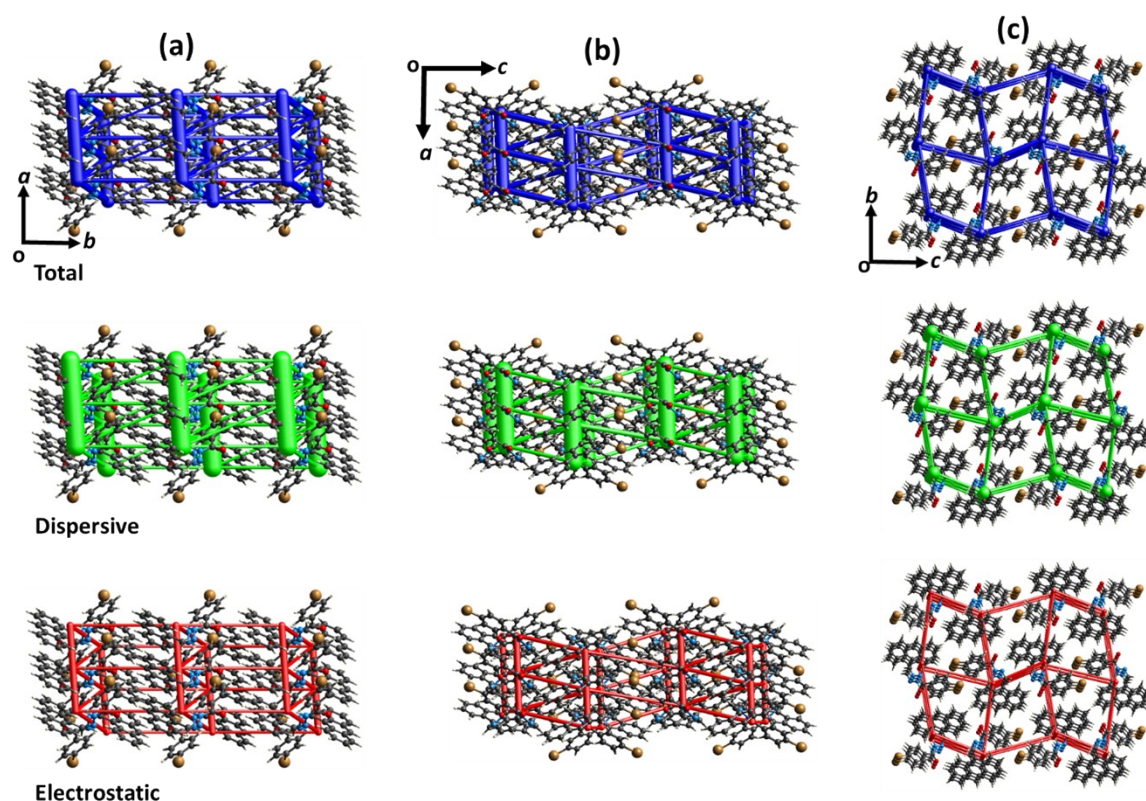

**Fig. S11.** Visualization of energy frameworks showing total interaction energy (top, blue), dispersion (middle, green) and electrostatic (below, red) components **BrAc**, in the (a) (001), (b) (010) and (c) (100) faces, respectively. The energy threshold is  $10 \text{ kJ}\cdot\text{mol}^{-1}$ .

**Table S2** Molecular structure pairs and the interaction energies ( $\text{kJ}\cdot\text{mol}^{-1}$ ) obtained from energy frameworks calculation for **BrAc**. Scale factors are in the lower table.

(a)

(b) Interaction Energies ( $\text{kJ}\cdot\text{mol}^{-1}$ )  
R is the distance between molecular centroids (mean atomic position) in Å.

Total energies, only reported for two benchmarked energy models, are the sum of the four energy components, scaled appropriately (see the scale factor table below)

| N | Symp              | R     | Electron Density | E_ele | E_pol | E_dis  | E_rep | E_tot |
|---|-------------------|-------|------------------|-------|-------|--------|-------|-------|
| 2 | x, y, z           | 4.33  | B3LYP/DGDZVP     | -33.4 | -5.8  | -113.2 | 111.5 | -69.3 |
| 1 | -x, -y, -z        | 10.53 | B3LYP/DGDZVP     | -4.3  | -0.4  | -10.5  | 7.1   | -9.5  |
| 1 | -x, -y, -z        | 9.08  | B3LYP/DGDZVP     | -16.7 | -1.3  | -33.5  | 41.1  | -22.4 |
| 1 | -x, -y, -z        | 9.77  | B3LYP/DGDZVP     | -15.6 | -5.6  | -21.2  | 18.9  | -27.4 |
| 2 | x, -y+1/2, z+1/2  | 11.25 | B3LYP/DGDZVP     | -5.4  | -1.1  | -18.1  | 15.9  | -12.5 |
| 2 | -x, y+1/2, -z+1/2 | 13.28 | B3LYP/DGDZVP     | 0.5   | -0.4  | -4.4   | 0.0   | -3.6  |
| 1 | -x, -y, -z        | 9.56  | B3LYP/DGDZVP     | -5.4  | -0.6  | -7.9   | 3.3   | -11.0 |
| 2 | x, -y+1/2, z+1/2  | 10.67 | B3LYP/DGDZVP     | -14.6 | -3.8  | -20.1  | 21.3  | -22.6 |
| 1 | -x, -y, -z        | 10.22 | B3LYP/DGDZVP     | -20.5 | -10.6 | -25.2  | 22.8  | -37.4 |
| 2 | -x, y+1/2, -z+1/2 | 13.39 | B3LYP/DGDZVP     | -1.0  | -0.6  | -8.0   | 0.0   | -8.4  |
| 1 | -x, -y, -z        | 12.29 | B3LYP/DGDZVP     | -2.8  | -0.5  | -2.4   | 0.0   | -5.4  |

Scale factors for benchmarked energy models  
See Mackenzie et al. IUCrJ (2017)

| Energy Model                                     | k_ele | k_pol | k_disp | k_rep |
|--------------------------------------------------|-------|-------|--------|-------|
| CE-HF ... HF/3-21G electron densities            | 1.019 | 0.651 | 0.901  | 0.811 |
| CE-B3LYP ... B3LYP/6-31G(d,p) electron densities | 1.057 | 0.740 | 0.871  | 0.618 |



## References:

1. G. M. Sheldrick. *Acta Crystallogr. Sec. A*, 2008, **64**, 112–122.
2. G. M. Sheldrick. *Z. Kristallogr. Cryst. Mater.*, 2002, **217**, 644-650.
3. G. M. Sheldrick. *Acta Crystallogr. A: Found. Adv.*, 2015, **71**, 3–8.
4. G. M. Sheldrick. *Acta Crystallogr. C Struct. Chem.*, 2015, **71**, 3-8.
5. P. Gupta, T. Panda, S. Allu, S. Borah, A. Baishya, A. Gunnam, A. Nangia, P. Naumov and N. K. Nath. *Cryst. Growth Des.*, 2019, **19(5)**, 3039-3044.
